# Supplementary material for: Using human-centered design to advance health literacy in local health department programming: a case study
Source: Springer Nature journal article supplement (doi:10.1186/s12889-025-22491-z), 2025-03-31
Supplement: MOESM1 [file 12889_2025_22491_MOESM1_ESM.pdf]

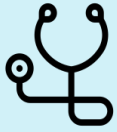

# Practitioner Covid discussion flowchart

This flowchart reframes the conversation about Covid vaccines using tested and studied methods

Start here

If the patient has **NOT** received a Covid vaccine, rely on the 'Key question framework'

*"It looks like you aren't up to date on the Covid vaccine. Would you like to discuss your options today?"*

OR

If the patient is due for a **booster**, rely on the 'Presumptive receptiveness framework'

*"It looks like you are due for a Covid vaccine booster, we can take care of that today"*

Yes, would like the vaccine

Ask MA to provide the vaccine and document it on the EHR

Undecided, leaning in

Make space for an open conversation:

- Ask if the patient has specific questions & answer them using simple language
- Explain why the vaccine is important and how it works, using proven & tested examples:
  - a. "The Covid vaccines work by building up your body's immune system."
  - b. "They are very safe and work very well at preventing serious illness."
  - c. "People who have not been vaccinated are 11 times more likely to die from Covid than people who have been vaccinated."
  - d. "You might still get Covid, but the symptoms will be less severe and unlikely to cause lasting impact to your health."
- Provide reassurance and evidence:
  - a. "They have been tested in over 100,000 people and over 4 billion people have received them."
  - b. (If true that you and family have been vaccinated) "I have been vaccinated, my family members have been vaccinated and I recommend that you should get vaccinated too."
- Discuss potential side effects
- If patient needs time to decide, provide further trusted resources

No, rejects the vaccine

Avoid passing judgement & preserve the real and perceived choice at stake:

*"Of course, this is your decision to make. I'm happy to discuss your options and my recommendation but I'll take your lead"* and only continue the conversation if the client is open to it
